# Supplementary material for: Enhanced osseointegration through direct energy deposition porous coating for cementless orthopedic implant fixation
Source: PubMed Central journal article supplement (PMC8595809; doi:10.1038/s41598-021-01739-9), 2021-11-16
Supplement: 41598_2021_1739_MOESM2_ESM.pdf [file 41598_2021_1739_MOESM2_ESM.pdf]

## Supplementary figures

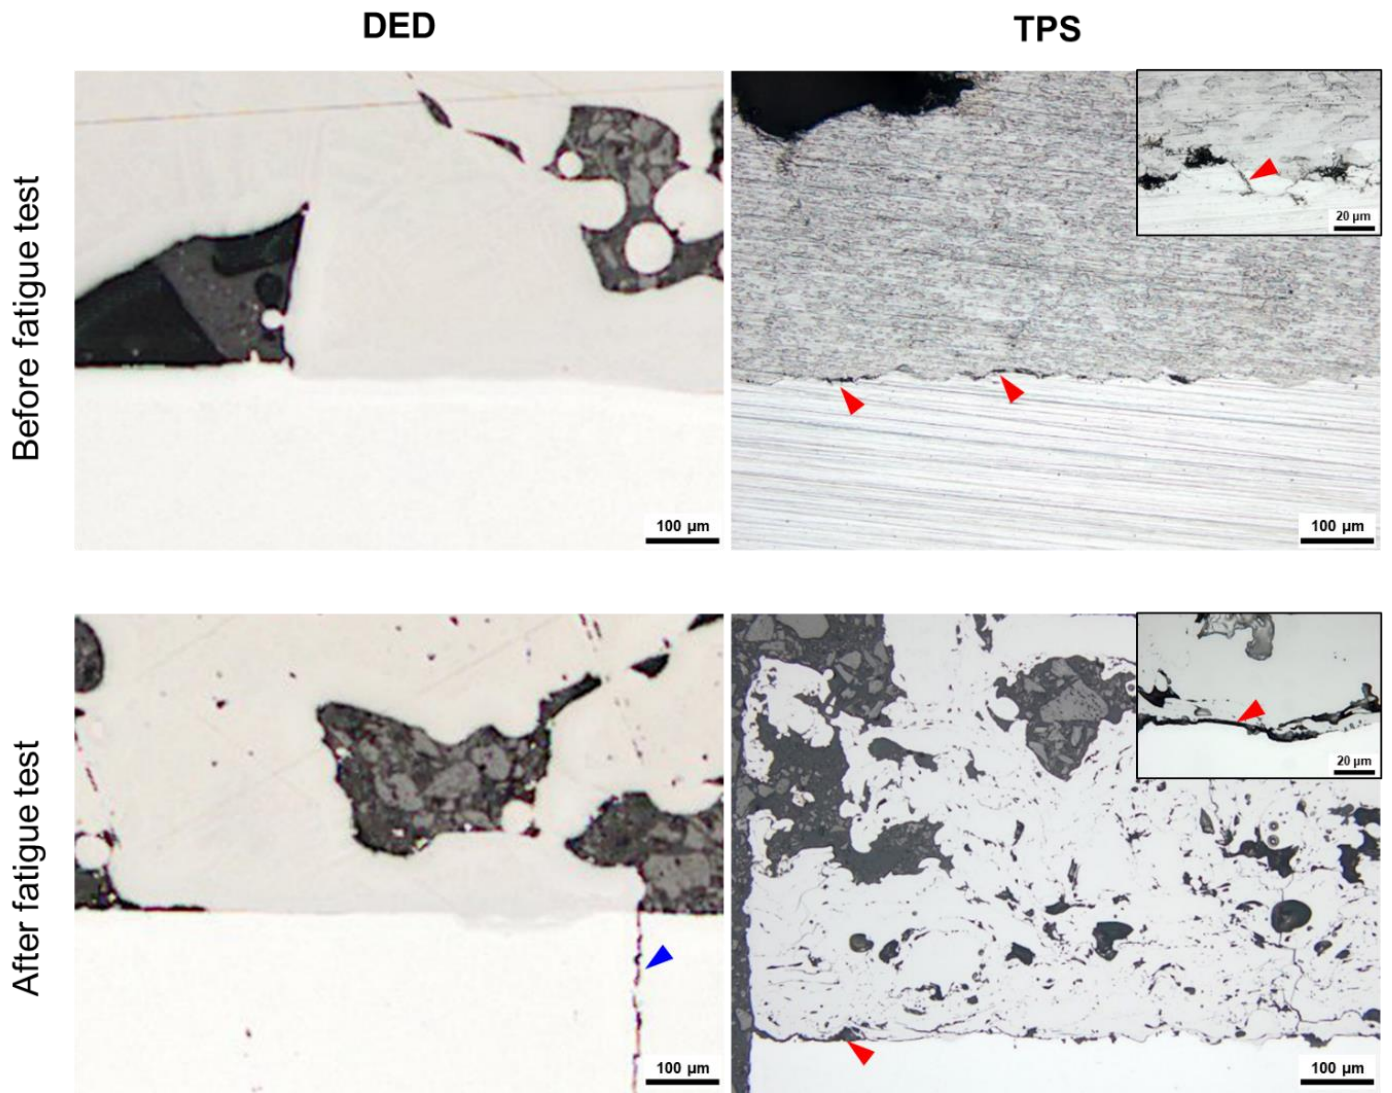

**Figure S1. Cut cross-sectional images of DED and TPS before and after fatigue test.** Red arrowhead indicates the site of debonding failure. Blue arrowhead indicates a crack caused by the fatigue test.

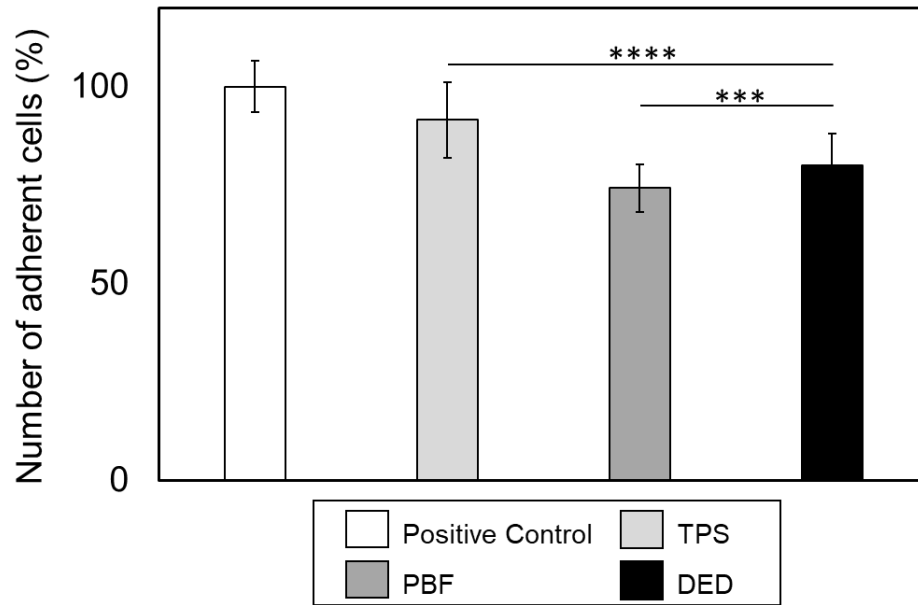

**Figure. S2. Cell adhesion properties in the early stage on the different surface.** Cell number was measured six hours after seeding. By CCK 8. Cell number are normalized by positive control and data are reported as mean  $\pm$  SD (\*\*p < 0.01. \*\*\*\*p < 0.0001).

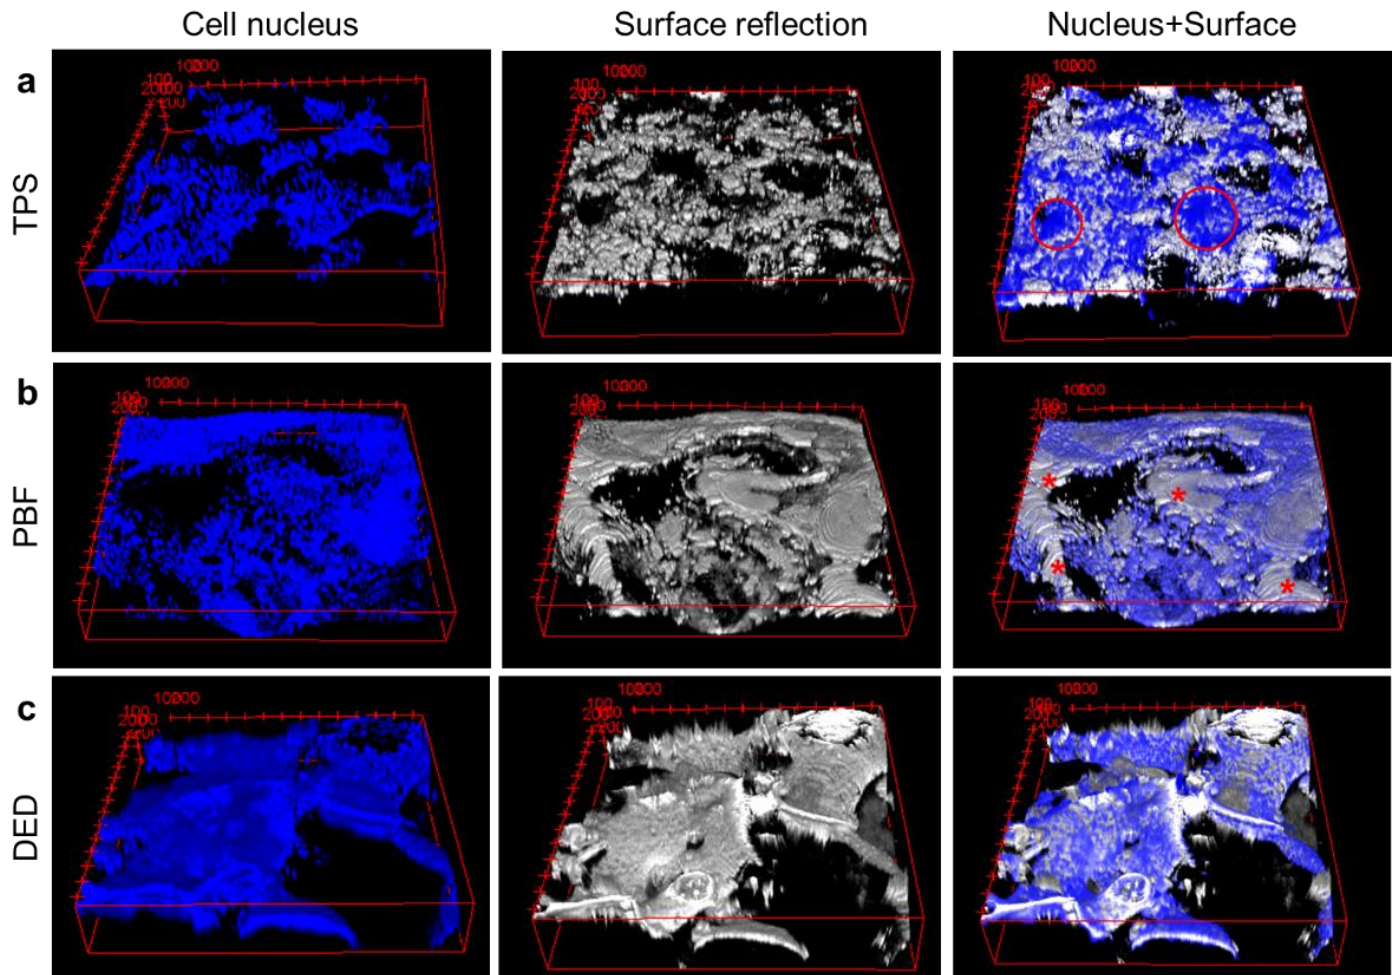

**Figure. S3. Confocal images of cells grown on (a) TPS, (b) PBF and (c) DED surface.** the nucleus is shown in blue (Hoechst) and the metal surface is shown in grey. The cells were visualized using a confocal microscope (Leica TCS SP5) Red circles indicate cell patches adhere on TPS surface. Red stars indicate patches without cells.

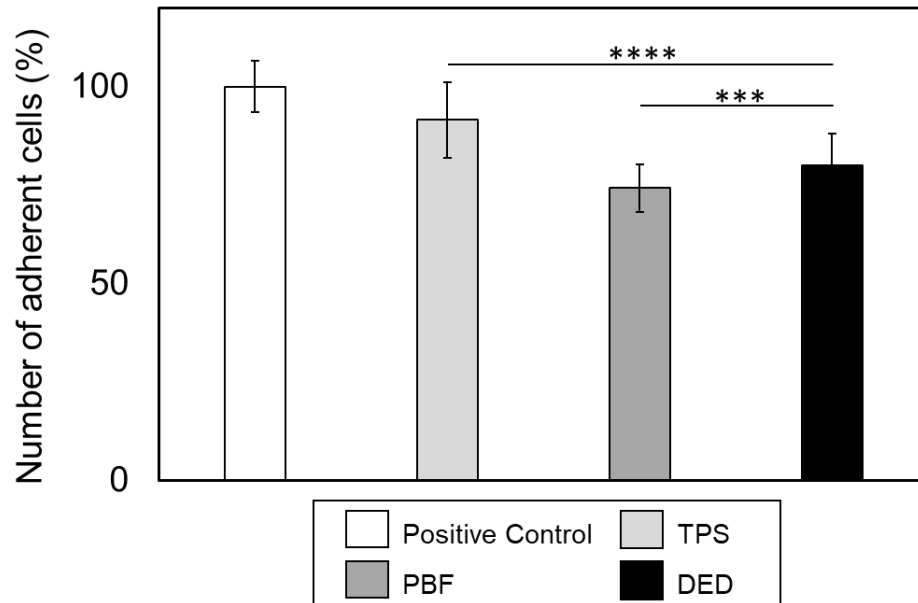

**Figure. S4. Cell adhesion properties in the early stage on the different surface.** Cell number was measured six hours after seeding. By CCK 8. Cell number are normalized by positive control and data are reported as mean  $\pm$  SD (\*\*p < 0.01. \*\*\*\*p < 0.0001).

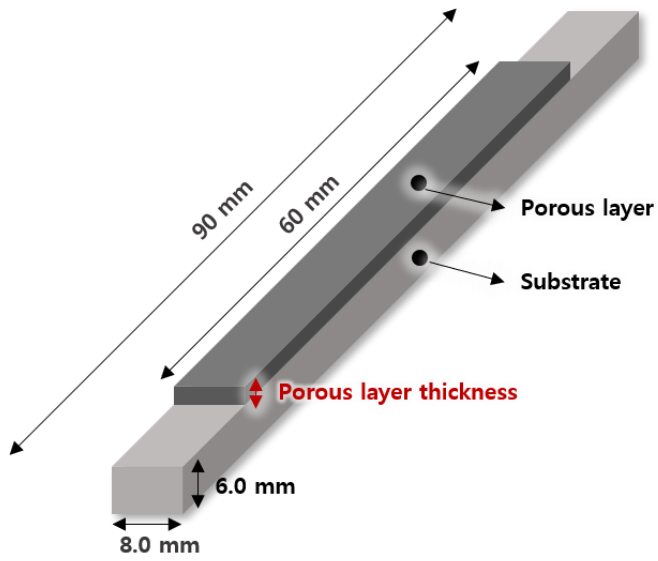

**[DED specimen]**

1. Materials:
  - Porous layer: Pure titanium
  - Substrate: CoCrMo F1537
2. Porous layer thickness: 1.0 mm

**[TPS specimen]**

1. Materials:
  - Porous layer: Pure titanium
  - Substrate: CoCrMo F1537
2. Porous layer thickness: 0.8 mm

**[PBF specimen]**

1. Materials:
  - Porous layer: Ti64 ELI
  - Substrate: Ti64 ELI
2. Porous layer thickness: 1.0 mm

Figure S5. Fatigue specimen size and dimensions for DED, TPS, and PBF.

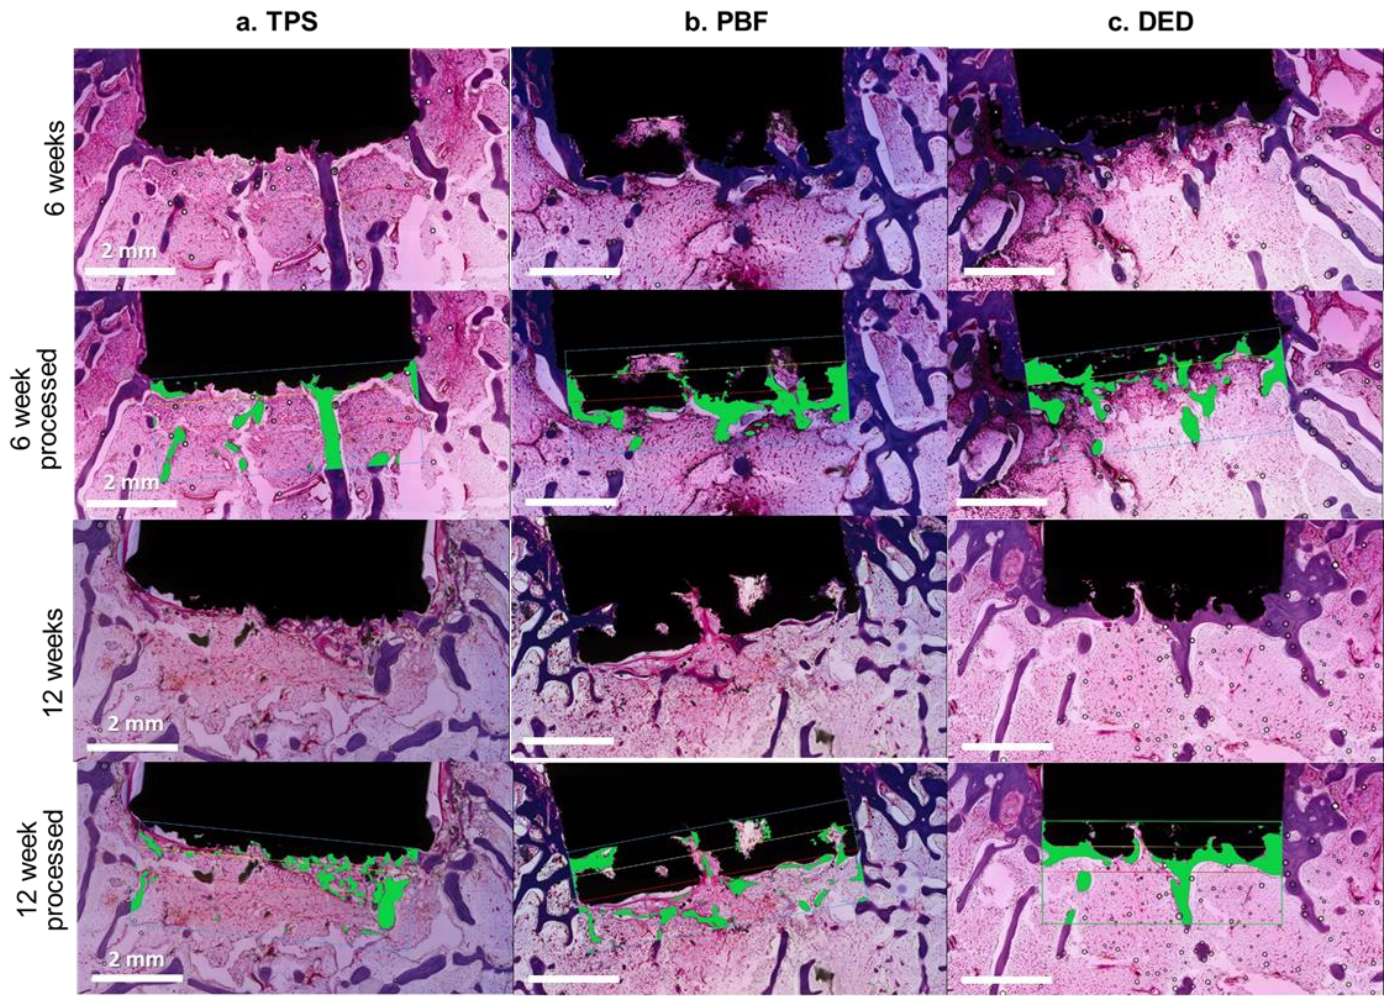

**Figure S6** The representative Mason-trichrome staining images of this study. a. TPS; b. PBF; c. DED. Green pixels indicate bone area.

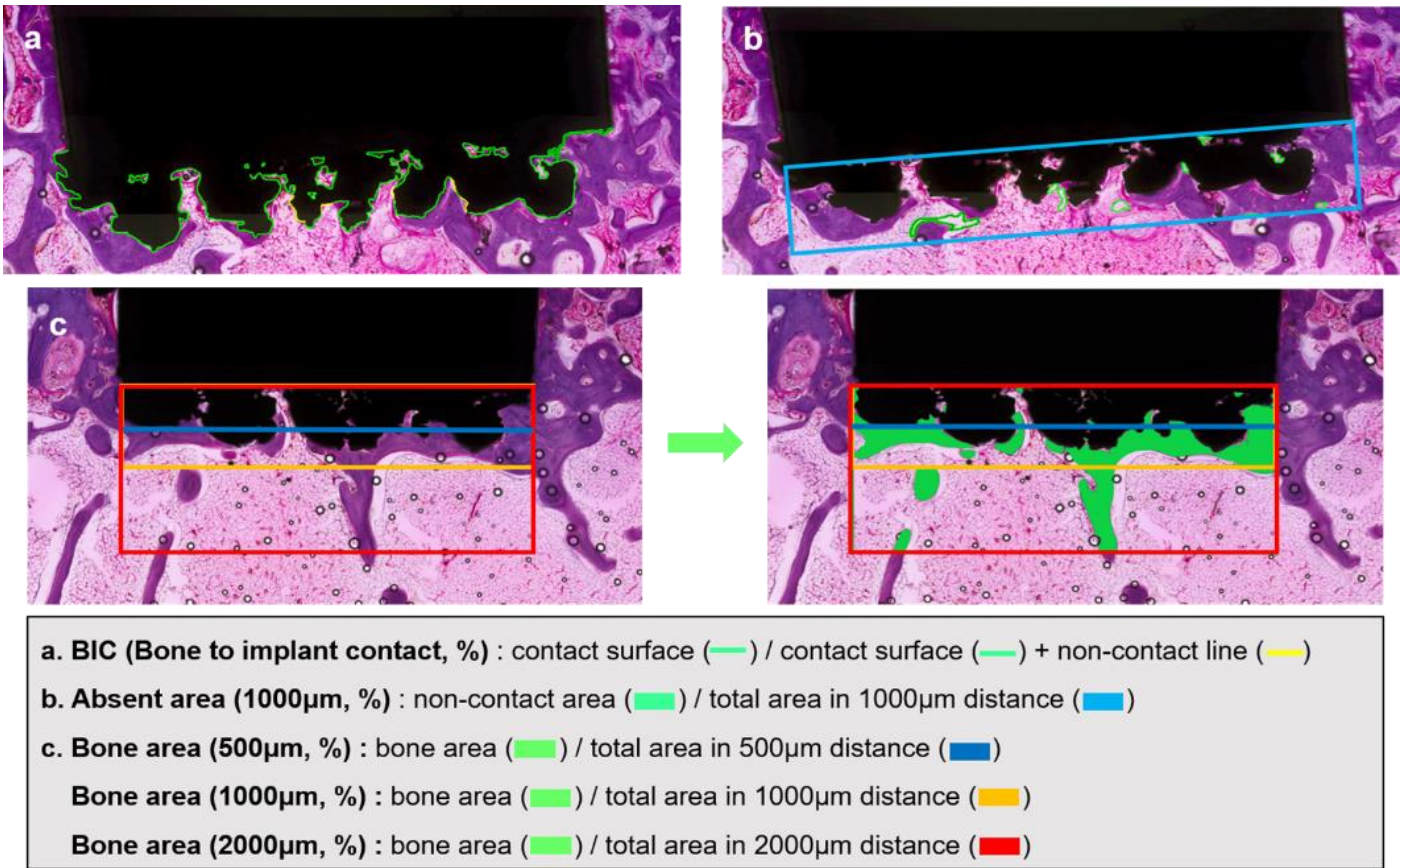

**Figure S7 The process of bone histomorphometry. a. Bone-to-implant contact (BIC):** determination of the percentage of direct contact surface between the mineralized bone and the porous surface; **b. Absent area:** determination of the percentage of non-contact area between the total area in a 1000 µm region; **c. Bone area** (1) **bone area (500-µm zone):** determination of the percentage of new bone formation and neovascularization area between the total area in a 500 µm region; (2) **bone area (1000-µm zone):** determination of the percentage of new bone formation and neovascularization area between the total area in a 1000 µm region; (3) **bone area (2000-µm zone):** determination of the percentage of new bone formation and neovascularization area between the total area in a 2000 µm region.
